# Supplementary material
Source: PubMed Central journal article supplement (PMC10842986)
Supplement: NIHMS1936480-supplement-1.pdf [file NIHMS1936480-supplement-1.pdf]

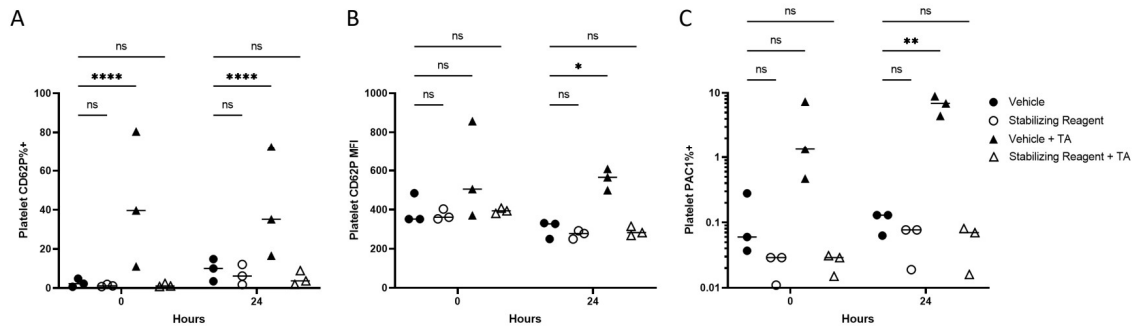

37

38 **Supplemental Fig. 1: Platelet stabilizing reagent inhibits in vitro platelet activation of**  
 39 **platelets from subjects with AERD after 30 minutes or 24 hours of exposure.** In subjects  
 40 with AERD (n=3), whole blood samples were treated with or without the platelet stabilizing  
 41 reagent (open symbols) or vehicle (solid symbols) for 30 minutes then stimulated with the  
 42 thromboxane receptor agonist, U46619 (500 nM, triangles) or vehicle (circles) for 30 minutes or  
 43 24 hours and stained for flow cytometry. Effect of treatment with the platelet stabilizing or  
 44 vehicle on platelet activation as assess by **A)** CD41<sup>+</sup> platelet % CD62P expression, **B)** CD41<sup>+</sup>  
 45 platelet CD62P mean fluorescent intensity (MFI) and **C)** CD41<sup>+</sup> platelet % PAC-1 expression.  
 46 Two-way ANOVA with post-hoc uncorrected Fisher's least squared difference from vehicle for  
 47 each time point reported. \* = p < 0.05, \*\* = p < 0.01, \*\*\*\* = p < 0.0001

48

49

50

51

52

53

54

55

56

57

58

59

60

61

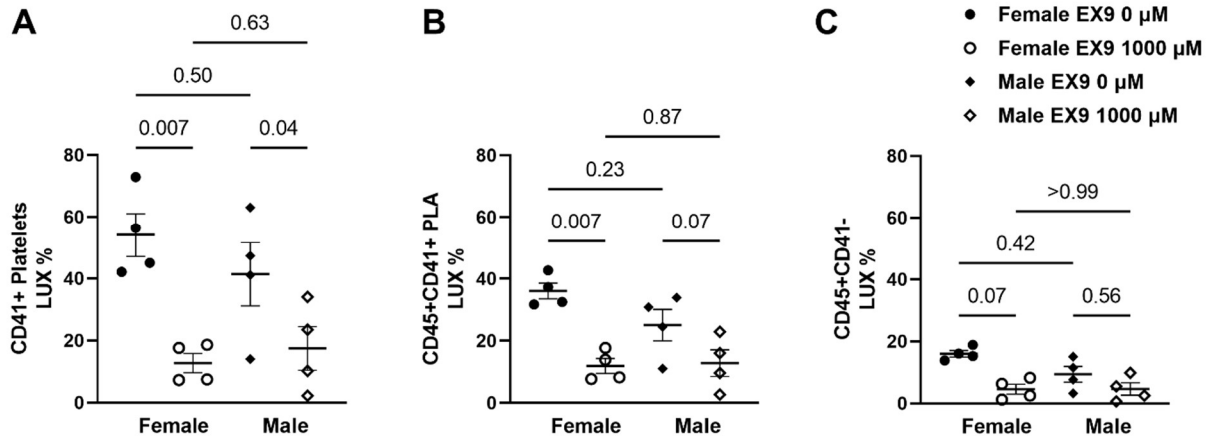

62  
 63 **Supplemental Fig. 2: GLP-1 receptor expression does not differ by sex.** LUXendin645 signal  
 64 following the selective GLP-1 receptor antagonist exendin-9-39 (EX9) pretreatment on **A)**  
 65 CD41+ platelets, **B)** CD45+CD41+ platelet-leukocyte aggregates and **C)** CD45+ leukocytes  
 66 from 8 adult wild-type C57B6 mice stratified by sex (4 females and 4 males). One-way ANOVA  
 67 with post-hoc group comparisons reported.

68  
 69  
 70  
 71  
 72  
 73  
 74  
 75  
 76  
 77  
 78  
 79  
 80  
 81  
 82

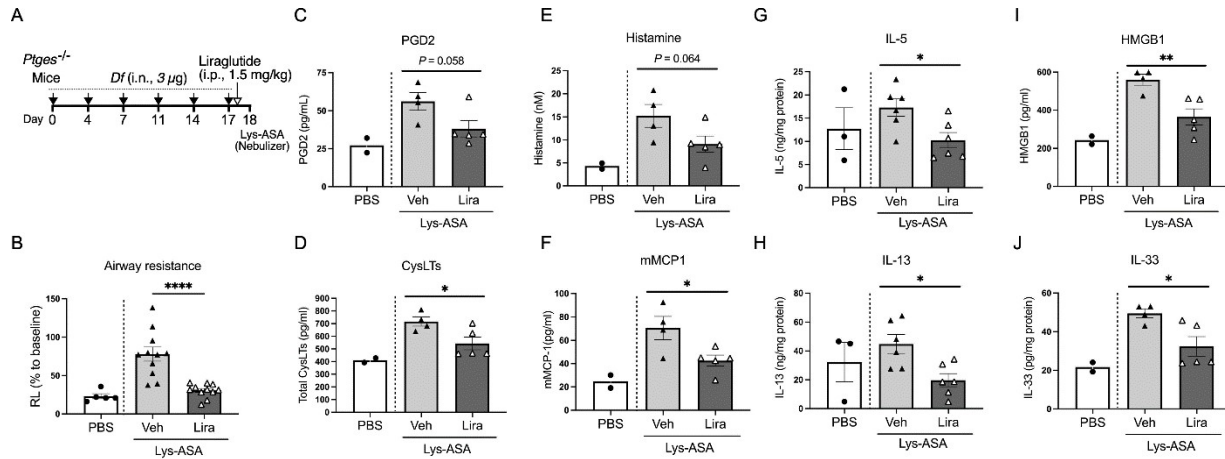

83

84

85 **Supplemental Fig. 3. GLP-1 receptor agonists attenuate type-2 inflammation and mast cell**  
 86 **mediator production following aspirin challenge in the *Ptges*<sup>-/-</sup> AERD mouse model. A)**

87 Protocol for intranasal administration of *Df* (3 µg) followed by Lysine-aspirin (Lys-ASA)  
 88 challenge. Liraglutide or PBS was administered 24 hours prior to Lys-ASA challenge. **B)** Airway  
 89 resistance ( $R_L$ ) in response to Lys-ASA was assessed with an Invasive Pulmonary Function  
 90 Device and compared across treatment groups. (PBS/Veh: n =5, Veh/Lys-ASA: n=11,  
 91 Liraglutide/Lys-ASA: n=11 mice from 3 experiments). Values are mean ± SEMs.

92 \*\*\*\*=p<.0.0001, by unpaired t-test **C-J)** Mast cell mediators and HMGB1 were measured in  
 93 BAL fluids and IL-5, IL-13, and IL-33 were measured in the lung. (PBS/Veh: n =2, Veh/Lys-  
 94 ASA: n=4, Liraglutide/Lys-ASA: n=5 mice from one experiment). Values are mean ± SEMs. \*=  
 95 p<0.05, \*\*=p<.0.01 by unpaired t-test. P=0.0635 (Histamine), by Mann Whitney test.

96

97

98

99

100

101

102

103

104

105

106

107

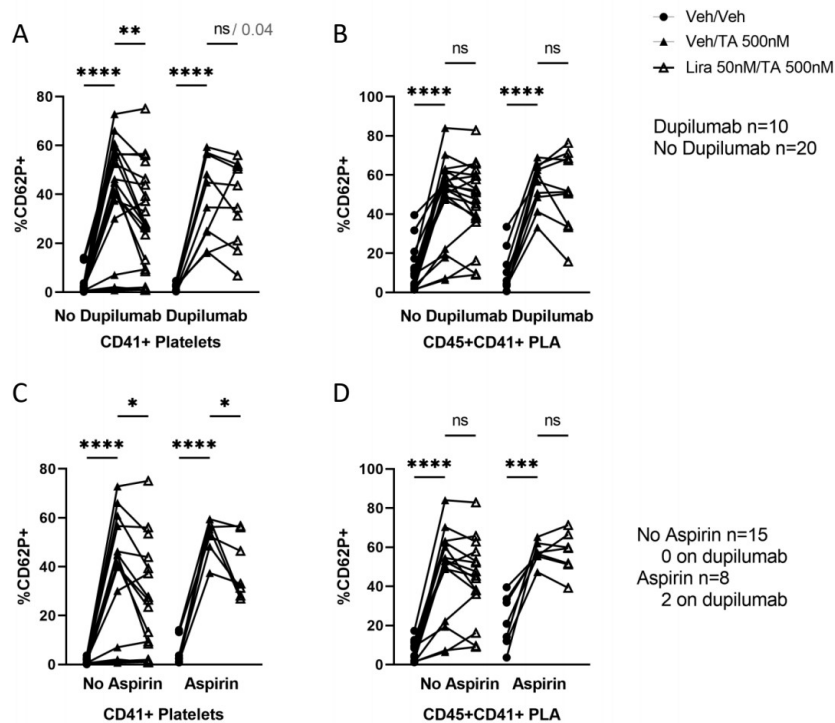

108

109

110 **Supplemental Fig. 4: Effect of dupilumab and aspirin exposure on thromboxane-induced**  
 111 **platelet activation in subjects with AERD.** In subjects with aspirin-exacerbated respiratory  
 112 disease, whole blood samples were treated with the GLP-1R agonist liraglutide (Lira 50 nM) or  
 113 vehicle (Veh) for 30 minutes then stimulated with the thromboxane receptor agonist, U46619  
 114 (TA 500 nM) for 30 minutes and stained for flow cytometry. **A)** Effect of pre-treatment with  
 115 liraglutide or vehicle on TA-induced CD41<sup>+</sup> platelet CD62P expression and **B)** CD45<sup>+</sup>CD41<sup>+</sup>  
 116 platelet-leukocyte aggregates (PLA) CD62P expression in individuals on dupilumab treatment.  
 117 Gray p-value reflects analysis with outlier excluded. **C)** Effect of pre-treatment with liraglutide  
 118 or vehicle on TA-induced CD41<sup>+</sup> platelet CD62P expression and **D)** CD45<sup>+</sup>CD41<sup>+</sup> PLA CD62P  
 119 expression in individuals on aspirin treatment. One-way ANOVA with post-hoc group  
 120 comparisons reported. \*\* = p<0.01, \*\*\*\* = p<0.0001

121

122
